# Supplementary material for: One-pot pyro synthesis of a nanosized-LiMn2O4/C cathode with enhanced lithium storage properties
Source: Royal Society of Chemistry journal article supplement (doi:10.1039/c9ra04015c), 2019-01-01
Supplement: c9ra04015c1.pdf [file c9ra04015c1.pdf]

**Supplementary Information**

**One-pot pyro synthesis of a nanosized-LiMn<sub>2</sub>O<sub>4</sub>/C cathode with enhanced lithium storage properties**

Jeonggeun Jo<sup>a</sup>, Sukyeung Nam<sup>a</sup>, Seungmi Han<sup>a</sup>, Vinod Mathew<sup>a</sup>, Muhammad Hilmy Alfaruqi<sup>a</sup>,  
Duong Tung Pham<sup>a</sup>, Seokhun Kim<sup>a</sup>, Sohyun Park<sup>a</sup>, Sunhyun Park<sup>a</sup> and Jaekook Kim<sup>a\*</sup>

<sup>a</sup>Department of Materials Science and Engineering, Chonnam National University, 300  
Yongbong-dong, Bukgu, Gwangju 61186, Republic of Korea

---

\*Corresponding author. Tel: +82-62-530-1703; Fax: +82-62-530-1699.

E-mail address: [jaekook@chonnam.ac.kr](mailto:jaekook@chonnam.ac.kr) (Jaekook Kim)

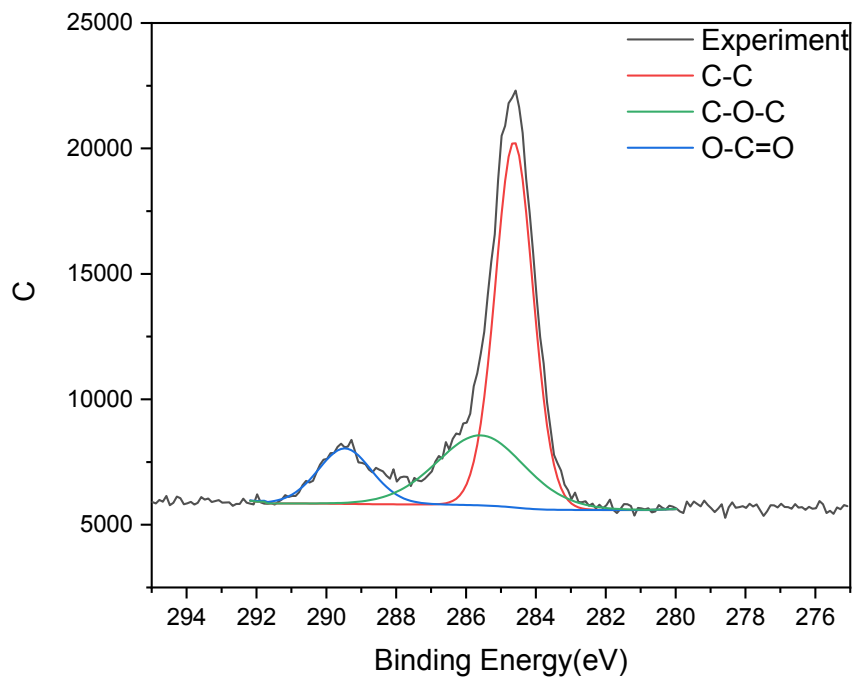

**Fig. S1** C1s XPS spectra for the LMO/C sample prepared by the pyro-synthesis method.

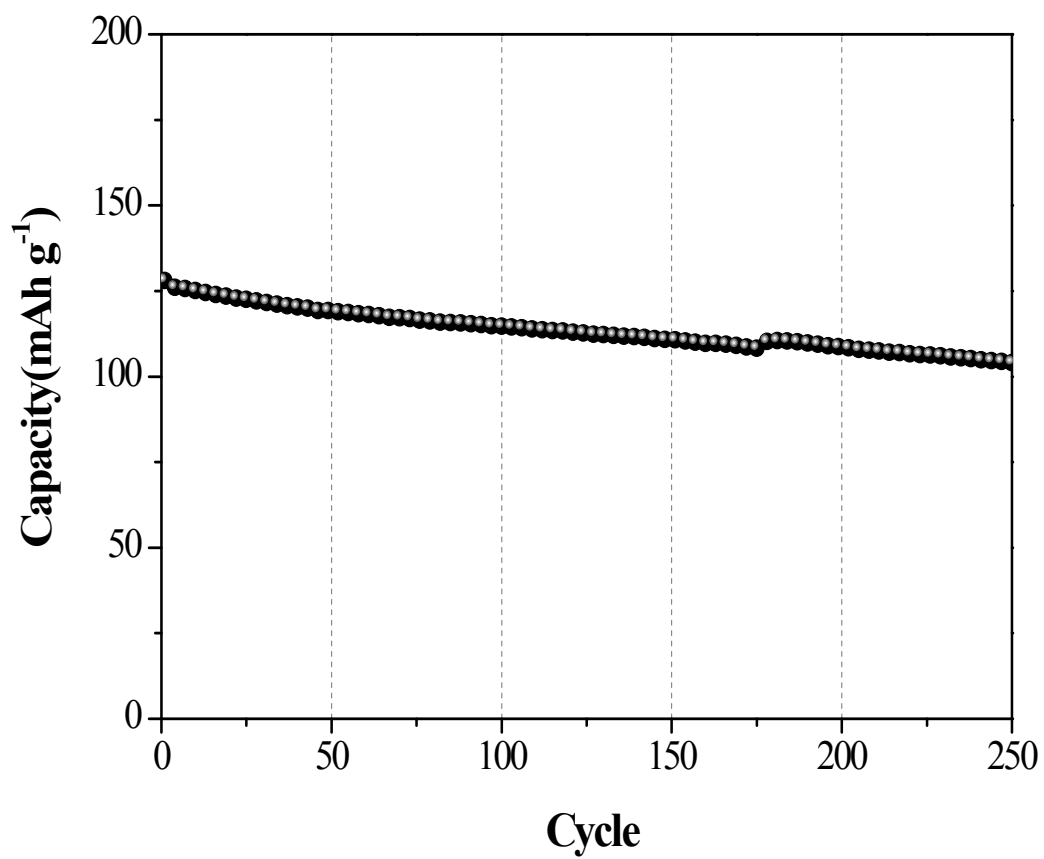

**Fig. S2** Cycle performance of the nanosized LMO/C sample prepared by pyro synthesis at 1C current density in the voltage range 3.0 to 4.3 V.
